# Supplementary material for: Statistical Modeling of Environmental Factors on Microbial Urea Hydrolysis Process for Biocement Production
Source: Hindawi journal article supplement (doi:10.1155/2015/340930), 2015-01-01
Supplement: f1 [file 340930.f1.pdf]

Table S1

Summary of ANOVA for the urea hydrolysis rate model fit

| Source                     | Mean Square                                                                                         | F-value | P-value, Prob.>F |
|----------------------------|-----------------------------------------------------------------------------------------------------|---------|------------------|
| <b>Model</b>               | 33.00                                                                                               | 2272.78 | < 0.0001         |
| <b>Lack of Fit</b>         | 0.011                                                                                               | 0.53    | 0.7075           |
| <b>R<sup>2</sup></b>       |                                                                                                     | 0.9997  |                  |
| <b>Adj. R<sup>2</sup></b>  |                                                                                                     | 0.9992  |                  |
| <b>Pred. R<sup>2</sup></b> |                                                                                                     | 0.9927  |                  |
| <b>C.V. %</b>              |                                                                                                     | 1.06    |                  |
| <b>Pred. Equ.</b>          | $\frac{1}{(r_U + 0.04)} = 8.26 - 2.90*A - 1.62*B + 0.51*C - 1.51*AB - 3.71*AC - 0.38*BC + 6.79*A^2$ |         |                  |

Design-Expert® Software

Factor Coding: Actual

Original Scale

Urea hydrolysis rate

0.105

0.001

X1 = A: Initial cell concentration

X2 = B: Urea concentration

Actual Factor

C: Temperature = -1

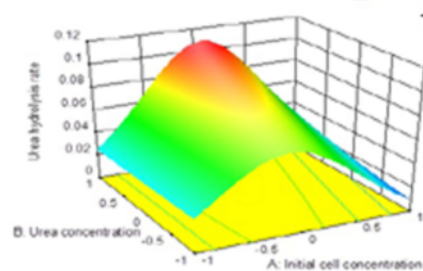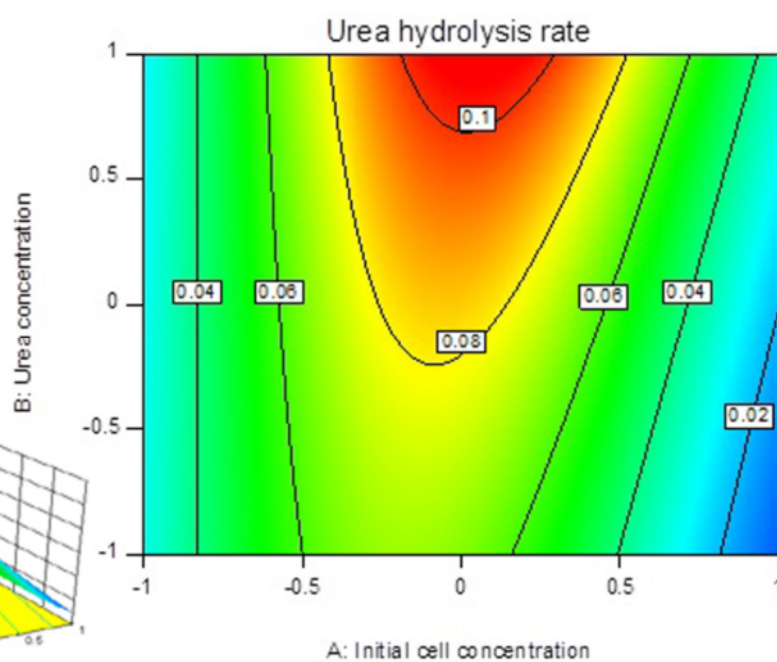

Design-Expert® Software

Factor Coding: Actual

Original Scale

Urea hydrolysis rate

0.105

0.001

X1 = A: Initial cell concentration

X2 = B: Urea concentration

Actual Factor

C: Temperature = 0

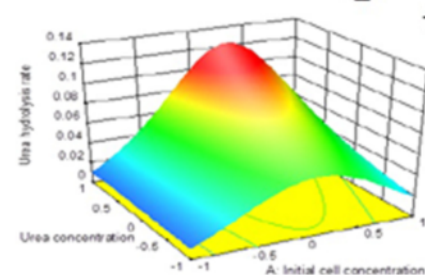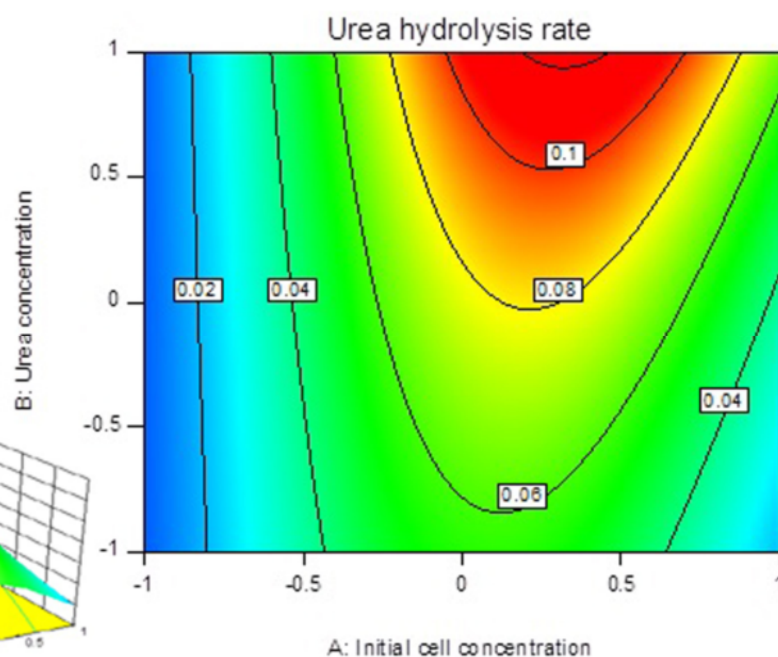

Design-Expert® Software

Factor Coding: Actual

Original Scale

Urea hydrolysis rate

0.105

0.001

X1 = A: Initial cell concentration

X2 = B: Urea concentration

Actual Factor

C: Temperature = 1

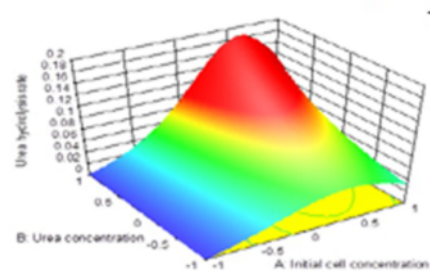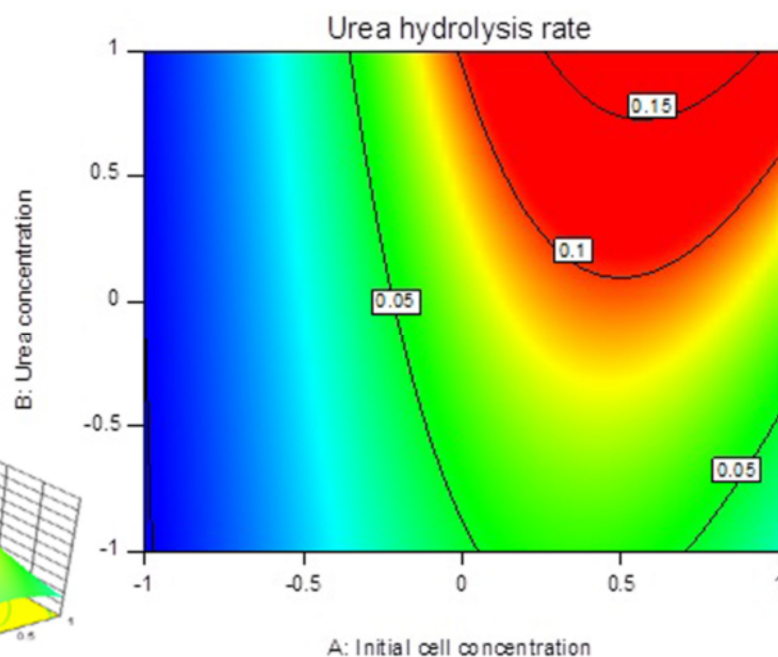

Fig. S1. Response surface plots of the mutual effect of the factors on the urea hydrolysis rate

Design-Expert® Software  
Bacterial growth

Color points by value of  
Bacterial growth:  
1.165  
0.051

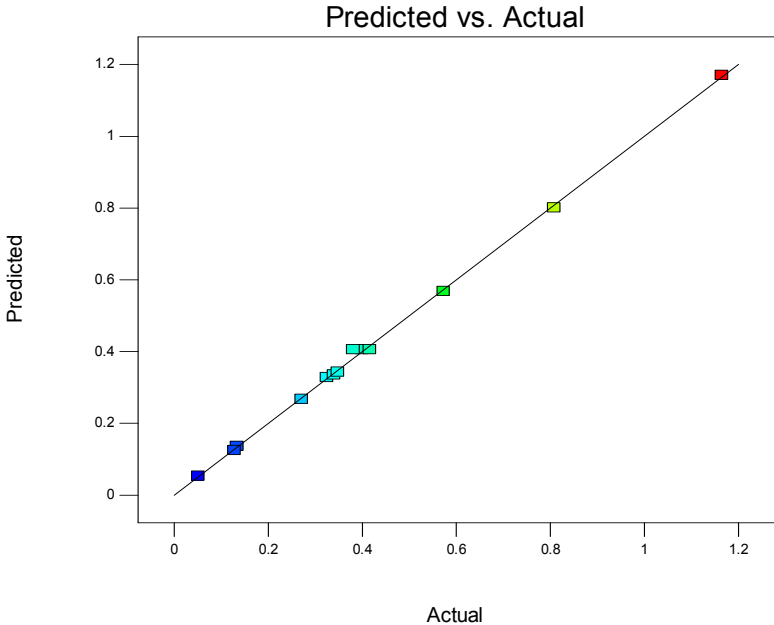

Design-Expert® Software  
Urea hydrolysis potential

Color points by value of  
Urea hydrolysis potential:  
90  
0.5

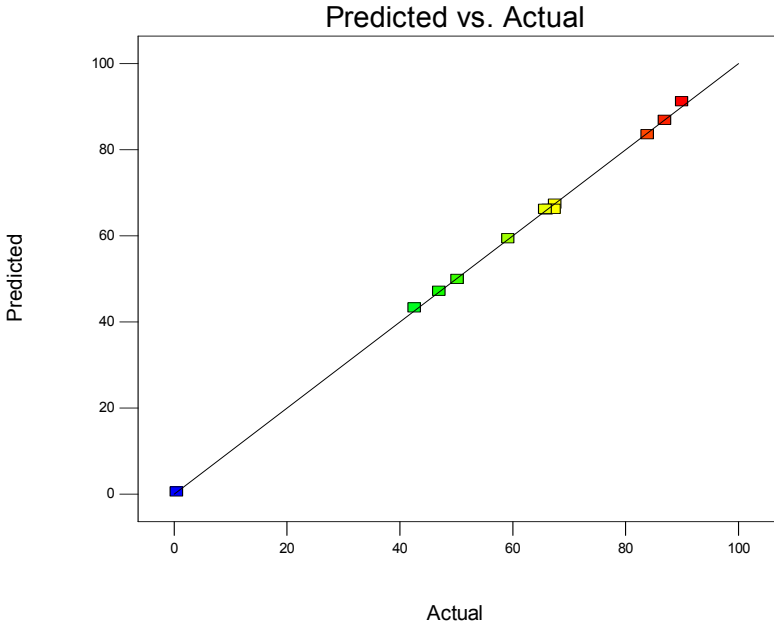

Design-Expert® Software  
Lag duration

Color points by value of  
Lag duration:

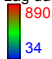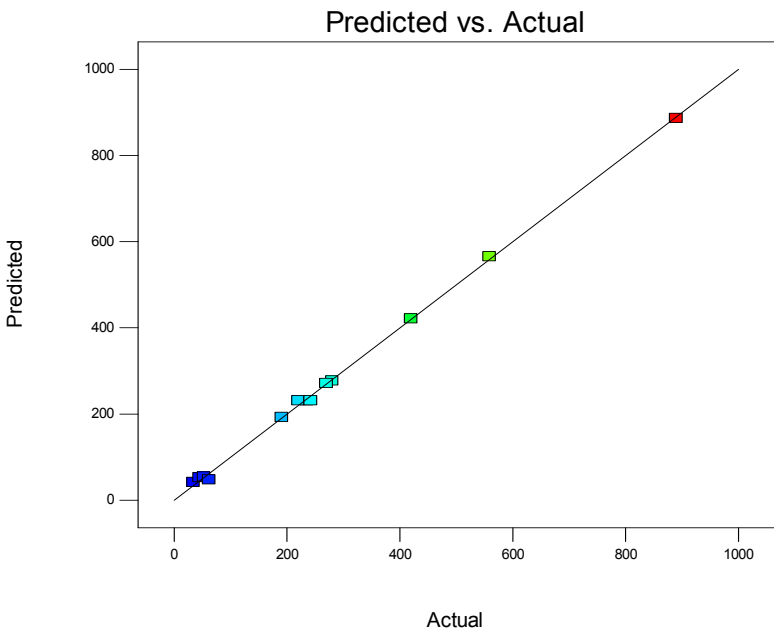

Design-Expert® Software  
Urea hydrolysis rate

Color points by value of  
Urea hydrolysis rate:

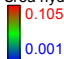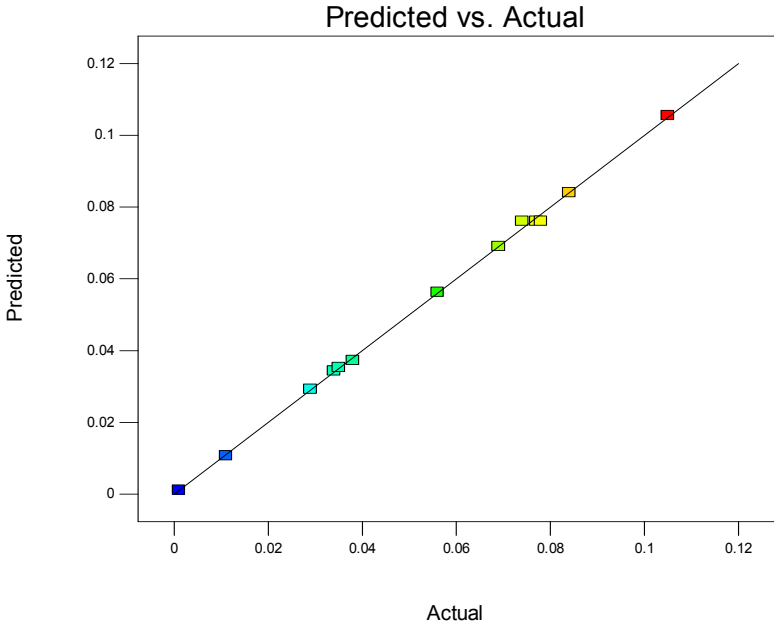

Design-Expert® Software  
Specific rate of urea hydrolysis

Color points by value of  
Specific rate of urea hydrolysis:  
0.56  
0.001

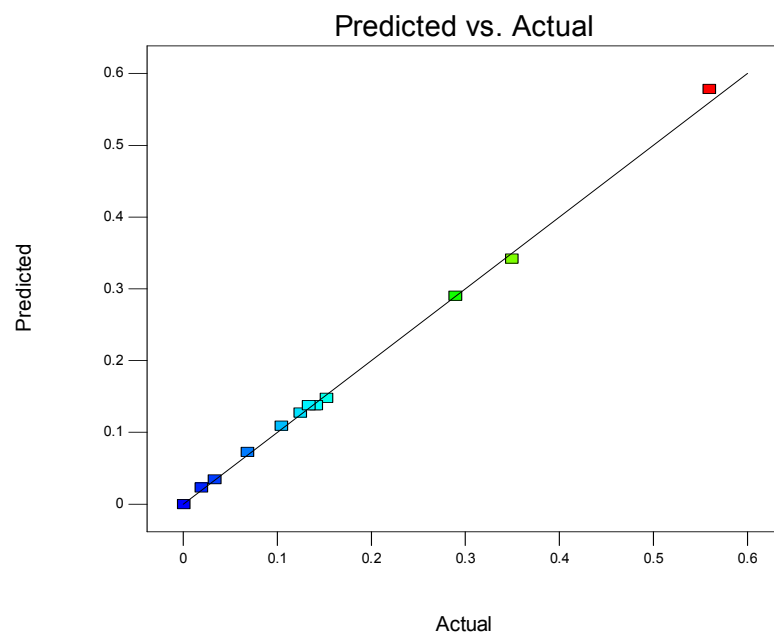

Fig. S2. Predicted responses by each statistical model versus actual observations from the experiments
